# Supplementary material for: Novel Biomimetic Human TLR2-Derived Peptides for Potential Targeting of Lipoteichoic Acid: An In Silico Assessment
Source: MDPI journal article supplement (doi:10.3390/biomedicines9081063), 2021-08-21
Supplement: s1 [file s1]

## Electronic Supplementary Information

### Novel biomimetic human TLR2-derived antimicrobial peptides for potential targeting of lipoteichoic acid: An *in silico* assessment.

Nikita Devnarain, Ayman Waddad, Beatriz G. de la Torr, Fernando Albericio and Thirumala Govender

Interaction bonds between all biomimetic TLR2-derived peptides with LTA and Mean energy fluctuations (RMSF calculations) of each peptide over 500 ns

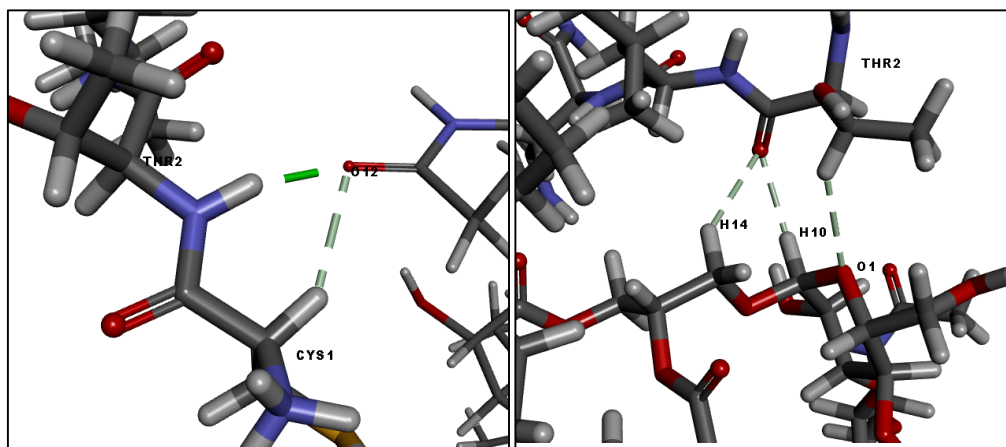

**Figure S1.** BTp 1 bound to LTA at 400 ns (left) and 500 ns (right).

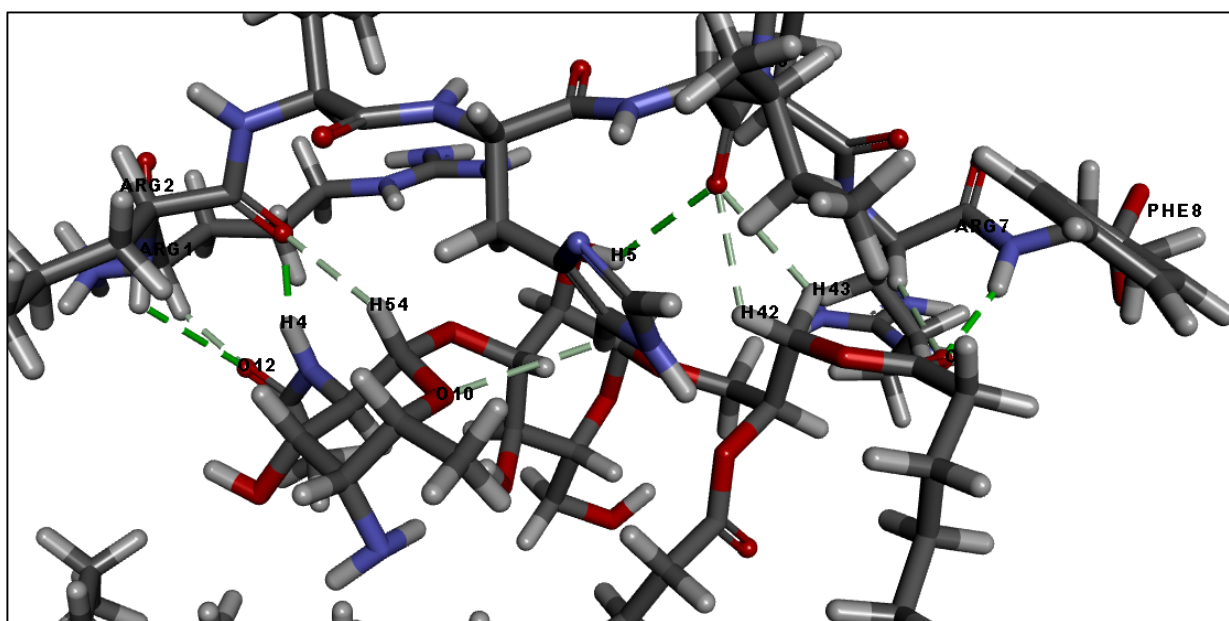

**Figure S2.** BTp 2 bound to LTA at 400 ns.

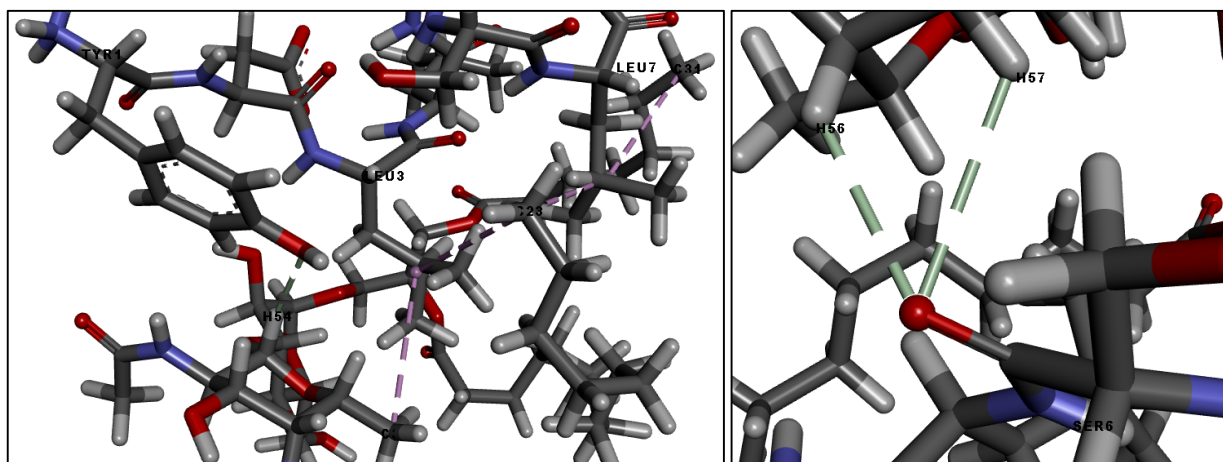

**Figure S3.** BTP 3 bound to LTA at 400ns (left) and 500 ns (right)

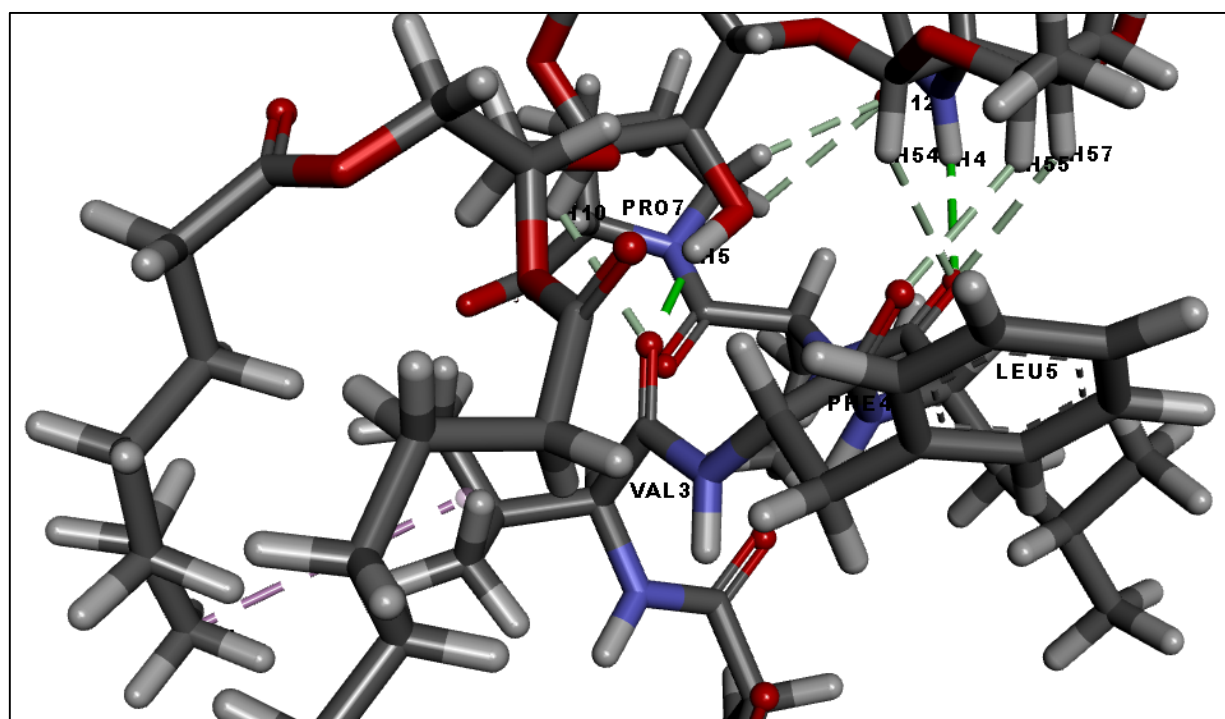

**Figure S4.** BTP 4 bound to LTA at 500 ns

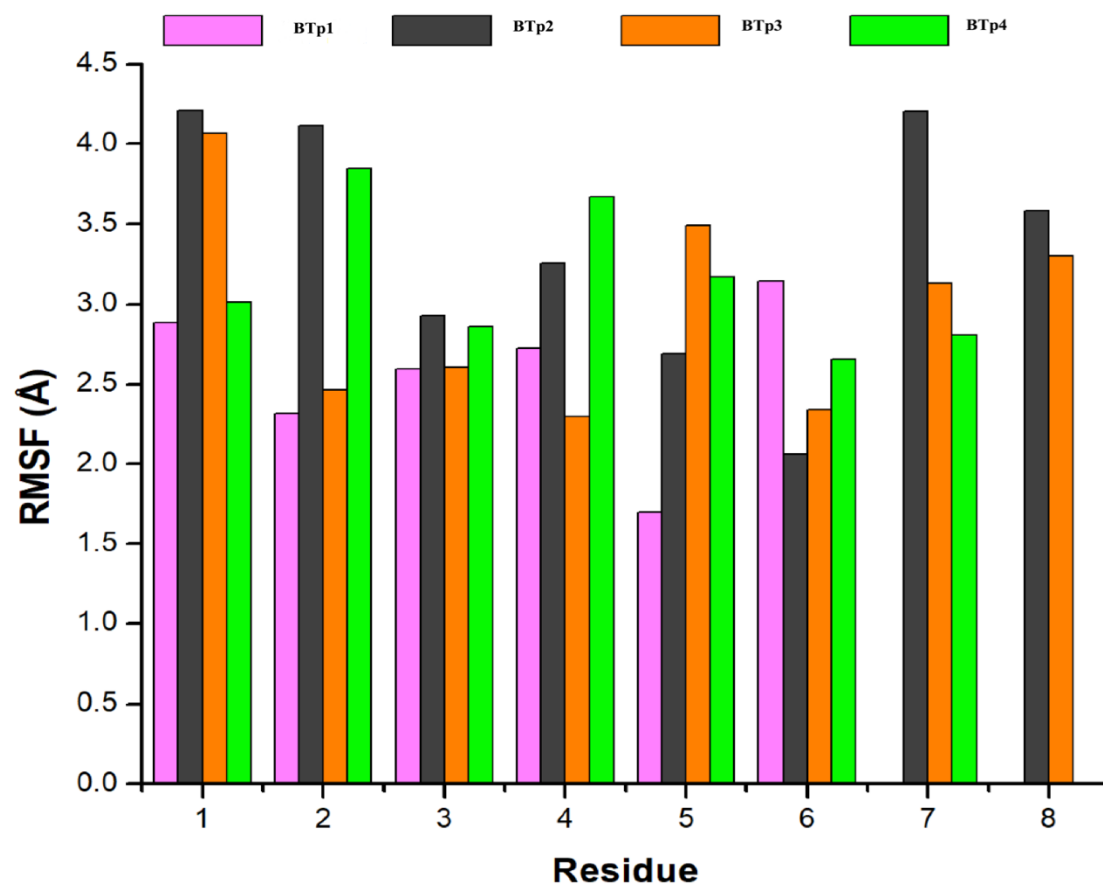

**Figure S5.** Mean energy fluctuations (RMSF calculations) of each peptide over 500 ns.
